# Supplementary material for: Impact of corticosteroid therapy on the outcomes of hepatocellular carcinoma treated with immune checkpoint inhibitor therapy
Source: HighWire-hosted journal article supplement (doi:10.1136/jitc-2020-000726), 2020-10-01

*Corticosteroid Therapy in HCC***Supplement****Impact of corticosteroid therapy on the outcomes of hepatocellular carcinoma treated with immune checkpoint inhibitor therapy.**

David J. Pinato et al.

**Contents****Tables.**

|                                                                                                                                                                    |                 |
|--------------------------------------------------------------------------------------------------------------------------------------------------------------------|-----------------|
| <b>Supplementary Table 1.</b><br>Geographical origin of HCC patients treated with ICI                                                                              | <b>Page 4.</b>  |
| <b>Supplementary Table 2.</b><br>The relationship between timing and indication of corticosteroid therapy.                                                         | <b>Page 4.</b>  |
| <b>Supplementary Table 3.</b><br>Pairwise comparison of median duration of corticosteroid therapy (days) across indication.                                        | <b>Page 5.</b>  |
| <b>Supplementary Table 4.</b><br>Pairwise comparison of corticosteroid exposure expressed as median prednisone (PDN) equivalent dose in mg/day across indications. | <b>Page 5.</b>  |
| <b>Supplementary Table 5.</b><br>Uni-variable analysis of factors contributing to overall survival.                                                                | <b>Page 6.</b>  |
| <b>Supplementary Table 6.</b><br>Multivariable analysis of factors contributing to overall survival                                                                | <b>Page 7.</b>  |
| <b>Supplementary Table 7.</b><br>Univariable analysis of factors contributing to progression-free survival.                                                        | <b>Page 8.</b>  |
| <b>Supplementary Table 8.</b><br>Multivariable analysis of factors contributing to progression-free survival.                                                      | <b>Page 9.</b>  |
| <b>Supplementary Table 9.</b><br>The relationship between corticosteroid exposure, response and survival: landmark time survival analysis.                         | <b>Page 10.</b> |

*Corticosteroid Therapy in HCC***Figures.****Supplementary Figure 1.****Page 11.**

Kaplan-Meier curves illustrating the the relationship between indication for corticosteroid therapy (CT), OS and PFS.

**Supplementary Figure 2.****Page 13.**

The relationship between duration of corticosteroid therapy (CT), daily predisone (PDN)-equivalent dose and OS

**Supplementary Figure 3.****Page 14.**

The relationship between corticosteroid therapy (CT) OS (**A**) and PFS (**B**) in patients with Child Pugh A cirrhosis.

**Supplementary Figure 4.****Page 15.**

The relationship between timing of corticosteroid therapy (CT) and OS (**A**) and PFS (**B**) in patients with Child Pugh A cirrhosis.

*Corticosteroid Therapy in HCC*

## Corticosteroid Therapy in HCC

**Table S1.** Geographical Origin of HCC patients treated with ICI.

| Region, Institution                          | Patients (%) |
|----------------------------------------------|--------------|
| <b>Europe</b>                                |              |
| Humanitas Cancer Center, Italy               | 37 (12)      |
| Imperial College London, United Kingdom      | 6 (2)        |
| Freiburg University, Germany                 | 3 (1)        |
| <b>North America</b>                         |              |
| Mount Sinai, New York                        | 93 (31)      |
| MD Anderson Cancer Center, Texas             | 65 (21)      |
| Kansas University Medical Center, Kansas     | 32 (10)      |
| Weill Cornell Medical Center, New York       | 20 (7)       |
| East Carolina Medical Centre, North Carolina | 3 (1)        |
| <b>Asia</b>                                  |              |
| Taipei Veterans General Hospital, Taiwan     | 45 (15)      |

**Table S2.** The relationship between timing and indication of corticosteroid therapy.

| Indication            | bCT (%)  | cCT (%)  | p value       |
|-----------------------|----------|----------|---------------|
| Co-morbidity          | 0 (0)    | 6 (10)   | <b>0.003*</b> |
| Palliation            | 2 (27)   | 3 (5)    |               |
| irAE                  | 0 (0)    | 27 (44)  |               |
| Procedure/Prophylaxis | 12 (73)  | 25 (41)  |               |
| TOTAL                 | 14 (100) | 61 (100) |               |

## Corticosteroid Therapy in HCC

**Table S3.** Pairwise comparison of median duration of corticosteroid therapy (days) across indication.

| Indications                           | Duration Indication 1 (Days) Median (IQR) | Duration Indication 2 (Days) Median (IQR) | Mann Whitney U | Adjusted <sup>§</sup> p value (2-sided) |
|---------------------------------------|-------------------------------------------|-------------------------------------------|----------------|-----------------------------------------|
| Procedure/Prophylaxis vs Co-morbidity | 2 (2)                                     | 5.5 (6)                                   | 8.18           | <b>0.02*</b>                            |
| Procedure/Prophylaxis vs Palliation   | 2 (2)                                     | 13.5 (9)                                  | 9.54           | <b>0.01*</b>                            |
| Procedure/Prophylaxis vs irAE         | 2 (2)                                     | 17 (6)                                    | 43.71          | <b>&lt;0.001*</b>                       |
| Comorbidity vs Palliation             | 5.5 (6)                                   | 13.5 (9)                                  | 6.66           | 0.65                                    |
| Comorbidity vs irAE                   | 5.5 (6)                                   | 17 (6)                                    | 2.99           | 1.0                                     |
| Palliation vs irAE                    | 13.5 (9)                                  | 17 (6)                                    | 1              | 1.0                                     |

§ Significance values adjusted by the Bonferroni correction for multiple tests.

**Table S4.** Pairwise comparison of corticosteroid exposure expressed as median prednisone (PDN) equivalent dose in mg/day across indications.

| Indications                          | PDN equivalent dose Indication 1 Median (IQR) | PDN equivalent dose Indication 2 Median (IQR) | Mann Whitney U | Adjusted <sup>§</sup> p value (2-sided) |
|--------------------------------------|-----------------------------------------------|-----------------------------------------------|----------------|-----------------------------------------|
| irAE vs Palliation                   | 40 (45)                                       | 37.5 (47.5)                                   | 0.57           | 1.0                                     |
| Palliation vs Procedure/Prophylaxis  | 37.5 (47.5)                                   | 50 (25)                                       | 4.11           | 1.0                                     |
| irAE vs Comorbidity                  | 40 (45)                                       | 67.5 (48.7)                                   | 0.83           | 1.0                                     |
| irAE vs Procedure/Prophylaxis        | 40 (60)                                       | 50 (25)                                       | 11.3           | <b>0.005*</b>                           |
| Palliation vs Comorbidity            | 37.5 (47.5)                                   | 67.5 (48.7)                                   | 0.11           | 1.0                                     |
| Procedure/Prophylaxis vs Comorbidity | 50 (25)                                       | 67.5 (48.7)                                   | 12.6           | <b>0.002*</b>                           |

§ Significance values adjusted by the Bonferroni correction for multiple tests.

## Corticosteroid Therapy in HCC

**Table S5.** Uni-variable analysis of factors contributing to overall survival.

| Predictor                                                     | Univariable model    |         |
|---------------------------------------------------------------|----------------------|---------|
|                                                               | Hazard Ratio (95%CI) | P-value |
| <b>Objective response rate (ORR)</b><br>CR+PR/SD+PD           | 4.4 (2.5-7.8)        | <0.001* |
| <b>AFP</b><br><400 ng/ml<br>>400 ng/ml                        | 1.4 (1.0-1.9)        | 0.03*   |
| <b>BCLC Stage</b><br>A-B<br>C                                 | 1.6 (1.1-2.5)        | 0.02*   |
| <b>Child Turcotte Pugh</b><br>A/B                             | 1.9 (1.3-2.6)        | <0.001  |
| <b>ECOG PS</b><br>0-1/2                                       | 1.8 (0.9-3.5)        | 0.10    |
| <b>Immunotherapy Treatment</b><br>Monotherapy/<br>Combination | 1.0 (0.6-1.8)        | 0.92    |
| <b>Prior systemic therapy for HCC,</b><br>0-1<br>>2           | 0.8 (0.4-1.6)        | 0.55    |
| <b>Corticosteroid Therapy (any time)</b><br>Y/N               | 0.8 (0.8-1.3)        | 0.88    |
| <b>Corticosteroid Therapy prior to ICI*</b><br>Y/N            | 1.2 (0.5-2.3)        | 0.54    |
| <b>Corticosteroid Therapy during ICI**</b><br>Y/N             | 0.8 (0.5-1.2)        | 0.29    |
| <b>Indication for Corticosteroid Therapy</b>                  | -                    | -       |
| PDN <10 mg/d                                                  | 0.8 (0.5-1.1)        | 0.20    |
| PDN ≥10 mg/d cancer-unrelated                                 | 1.7 (0.7-3.8)        | 0.23    |
| PDN ≥10 mg/d cancer-related                                   |                      |         |

\*Defined as PDN ≥10 mg/d pre-ICI

\*\*Defined as PDN ≥10 mg/d during ICI

## Corticosteroid Therapy in HCC

Table S6. Multi-variable analysis of factors contributing to overall survival.

| Predictor                                                                                                                | Multivariable model 1 |         | Multivariable model 2 |         | Multivariable model 3               |                                      |
|--------------------------------------------------------------------------------------------------------------------------|-----------------------|---------|-----------------------|---------|-------------------------------------|--------------------------------------|
|                                                                                                                          | Hazard Ratio (95%CI)  | P-value | Hazard Ratio (95%CI)  | P-value | Hazard Ratio (95%CI)                | P-value                              |
| <b>BCLC Stage</b><br>A-B<br>C                                                                                            | 1.4 (0.8-2.4)         | 0.13    | 1.5 (0.9-2.5)         | 0.13    | 1.4 (0.8-2.3)                       | 0.19                                 |
| <b>AFP</b><br><400 ng/ml<br>>400 ng/ml                                                                                   | 1.1 (0.7-1.8)         | 0.50    | 1.1 (0.8-1.7)         | 0.62    | 1.1 (0.7-1.7)                       | 0.76                                 |
| <b>Child Turcotte Pugh</b><br>A/B                                                                                        | 2.3 (1.4-3.5)         | <0.001* | 2.2 (1.4-3.5)         | <0.001* | 2.2 (1.4-3.5)                       | <0.001*                              |
| <b>ECOG PS</b><br>0-1/2                                                                                                  | 1.2 (0.5-2.7)         | 0.61    | 1.2 (0.6-2.7)         | 0.60    | 1.3 (0.6-2.9)                       | 0.46                                 |
| <b>Immunotherapy Treatment</b><br>Monotherapy/<br>Combination                                                            | 1.1 (0.6-2.0)         | 0.75    | 1.1 (0.6-1.9)         | 0.80    | 1.1 (0.6-2.0)                       | 0.68                                 |
| <b>Corticosteroid Therapy prior to ICI*</b><br>Y/N                                                                       | 3.3 (0.4-24.4)        | 0.23    | -                     | -       | -                                   | -                                    |
| <b>Corticosteroid Therapy during ICI**</b><br>Y/N                                                                        | -                     | -       | 0.7 (0.4-1.3)         | 0.23    | -                                   | -                                    |
| <b>Corticosteroid Therapy Indication</b><br>PDN <10 mg/d<br>PDN ≥10 mg/d cancer-unrelated<br>PDN ≥10 mg/d cancer-related | -                     | -       | -                     | -       | -<br>0.4 (0.2-0.9)<br>2.1 (0.9-5.3) | <b>0.02*</b><br><b>0.03*</b><br>0.09 |

## Corticosteroid Therapy in HCC

**Table S7.** Uni-variable analysis of factors contributing to progression-free survival.

| Predictor                                                                                                                    | Univariable model                   |                                        |
|------------------------------------------------------------------------------------------------------------------------------|-------------------------------------|----------------------------------------|
|                                                                                                                              | Hazard Ratio (95%CI)                | P-value                                |
| <b>BCLC Stage</b><br>A-B<br>C                                                                                                | 1.4 (0.9-2.1)                       | 0.06                                   |
| <b>AFP</b><br><400 ng/ml/<br>>400 ng/ml                                                                                      | 1.1 (0.8-1.5)                       | 0.53                                   |
| <b>Child Turcotte Pugh</b><br>A/B                                                                                            | 1.2 (0.8-1.7)                       | 0.32                                   |
| <b>ECOG PS</b><br>0-1/2                                                                                                      | 2.3 (1.3-4.3)                       | <b>0.005*</b>                          |
| <b>Immunotherapy Treatment</b><br>Monotherapy/<br>Combination                                                                | 0.9 (0.5-1.6)                       | 0.68                                   |
| <b>Prior systemic therapy for HCC,</b><br>0-1<br>>2                                                                          | 1.4 (0.8-2.4)                       | 0.13                                   |
| <b>Corticosteroid Therapy</b><br>Y/N                                                                                         | 0.8 (0.6-1.2)                       | 0.22                                   |
| <b>Corticosteroid Therapy prior to ICI*</b><br>Y/N                                                                           | 0.7 (0.3-1.5)                       | 0.37                                   |
| <b>Corticosteroid Therapy during ICI**</b><br>Y/N                                                                            | 0.9 (0.6-1.3)                       | 0.42                                   |
| <b>Indication for Corticosteroid Therapy</b><br>PDN <10 mg/d<br>PDN ≥10 mg/d cancer-unrelated<br>PDN ≥10 mg/d cancer-related | -<br>0.7 (0.5-1.0)<br>3.4 (1.6-7.4) | <b>0.001*</b><br>0.07<br><b>0.002*</b> |



## Corticosteroid Therapy in HCC

Table S8. Multi-variable analysis of factors contributing to progression-free survival.

| Predictor                                                                                                                        | Multivariable model 1   |              | Multivariable model 2   |              | Multivariable model 3                |                                                |
|----------------------------------------------------------------------------------------------------------------------------------|-------------------------|--------------|-------------------------|--------------|--------------------------------------|------------------------------------------------|
|                                                                                                                                  | Hazard Ratio<br>(95%CI) | P-value      | Hazard Ratio<br>(95%CI) | P-value      | Hazard Ratio<br>(95%CI)              | P-value                                        |
| <b>BCLC Stage</b><br>A-B<br>C                                                                                                    | 1.0<br>(0.7-1.7)        | 0.70         | 1.1<br>(0.6-1.7)        | 0.75         | 1.1<br>(0.4-1.4)                     | 0.74                                           |
| <b>AFP</b><br><400 ng/ml/<br>>400 ng/ml                                                                                          | 1.0<br>(0.9-1.4)        | 0.75         | 0.9<br>(0.6-1.3)        | 0.57         | 0.8<br>(0.5-1.2)                     | 0.44                                           |
| <b>Immunotherapy Treatment</b><br>Monotherapy/<br>Combination                                                                    | 0.7<br>(0.4-1.3)        | 0.35         | 0.7<br>(0.4-1.3)        | 0.29         | 0.7<br>(0.4-1.3)                     | 0.33                                           |
| <b>ECOG PS</b><br>0-1/2                                                                                                          | 2.0<br>(1.0-4.0)        | <b>0.03*</b> | 2.1<br>(1.1-4.0)        | <b>0.03*</b> | 2.4<br>(1.2-4.6)                     | <b>0.001*</b>                                  |
| <b>Corticosteroid Therapy prior<br/>to ICI*</b><br>Y/N                                                                           | 3.9<br>(0.5-28.6)       | 0.17         | -                       | -            | -                                    | -                                              |
| <b>Corticosteroid Therapy during<br/>ICI**</b><br>Y/N                                                                            | -                       | -            | 0.7<br>(0.4-1.2)        | 0.16         | -                                    | -                                              |
| <b>Indication for Corticosteroid<br/>Therapy</b><br>PDN <10 mg/d<br>PDN ≥10 mg/d cancer-unrelated<br>PDN ≥10 mg/d cancer-related | -                       | -            | -                       | -            | -<br>0.6 (0.3-1.0)<br>4.4 (1.7-11.1) | <b>0.001*</b><br><b>0.05*</b><br><b>0.002*</b> |

## Corticosteroid Therapy in HCC

**Table S9.** The relationship between corticosteroid exposure, response and survival: landmark time survival analysis.

| Corticosteroid (CT) Exposure      | Time point of CT exposure (month) | Best Response | N        | Death n (%) | Progression n (%) | Median PFS months (95% CI) | Median OS months (95% CI) |
|-----------------------------------|-----------------------------------|---------------|----------|-------------|-------------------|----------------------------|---------------------------|
| <b>PDN &gt;10 mg during ICI</b>   | first 3 mo.                       | CR + PR       | 1        | 0 (0)       | 0 (0)             | NR                         | NR                        |
|                                   |                                   | SD + PD       | 18       | 5 (28)      | 8 (44)            | 3.3 (1.4 – 12.1)           | 7.5 (2.5 – 9.0)           |
|                                   |                                   | All           | 19       | 5 (26)      | 8 (42)            | 4.6 (1.4 – 9)              | 7.5 (2.5 – NR)            |
|                                   | first 6 mo.                       | CR + PR       | 3        | 0 (0)       | 0 (0)             | 8.2 (7.5 – NR)             | 8.2 (7.5 – NR)            |
|                                   |                                   | SD + PD       | 24       | 7 (29)      | 13 (54)           | 4.6 (2.4 – 8.4)            | 8.5 (3.3 – 15.4)          |
|                                   |                                   | All           | 27       | 7 (26)      | 13 (48)           | 6.1 (2.5 – 8.4)            | 8.2 (7.1 – 9.9)           |
|                                   | first 9 mo.                       | CR + PR       | 3        | 2 (67)      | 3 (100)           | 8.2 (7.5 – NR)             | 8.2 (7.5 – NR)            |
|                                   |                                   | SD + PD       | 27       | 15 (56)     | 17 (63)           | 5.5 (2.5 – 8.4)            | 8.5 (4.1 – 10.4)          |
|                                   |                                   | All           | 30       | 17 (57)     | 20 (67)           | 6.3 (2.6 – 8.4)            | 8.2 (7.1 – 10.4)          |
|                                   | first 12 mo.                      | CR + PR       | 5        | 2 (40)      | 3 (60)            | 9.0 (7.5 – NR)             | NR (7.5 – NR)             |
|                                   |                                   | SD + PD       | 27       | 17 (63)     | 17 (63)           | 5.5 (2.5 – 8.4)            | 8.5 (4.1 – 10.4)          |
|                                   |                                   | All           | 32       | 19 (59)     | 20 (62)           | 6.8 (3.3 – 9.0)            | 8.5 (7.3 – 12.8)          |
|                                   | any time*                         | CR + PR       | 14       | 3 (21)      | 4 (29)            | NR (8.2 – NR)              | NR (8.2 – NR)             |
|                                   |                                   | SD + PD       | 48       | 26 (54)     | 33 (69)           | 6.1 (3.1 – 8.9)            | 9.9 (7.2 – 17.7)          |
|                                   |                                   | All           | 62       | 29 (48)     | 37 (60)           | 8.2 (5.6 – 12.5)           | 16.1 (8.9 – NR)           |
| <b>PDN &gt;10 mg prior to ICI</b> | CR + PR                           | 2             | 1 (50)   | 0 (0)       | NR                | 12.8 (12.8 – NR)           |                           |
|                                   | SD + PD                           | 12            | 9 (75)   | 7 (58)      | 5.5 (1.4 – NR)    | 9.2 (2.7 – NR)             |                           |
|                                   | All                               | 14            | 10 (71)  | 7 (50)      | 6.8 (2.0 – NR)    | 10.4 (4.9 – 18)            |                           |
| <b>PDN 0 to &lt;10 mg**</b>       | CR + PR                           | 45            | 10 (22)  | 11 (25)     | NR (19.0 – NR)    | 23.3 (18.7 – NR)           |                           |
|                                   | SD + PD                           | 166           | 100 (60) | 111 (67)    | 3.7 (3.2 – 4.2)   | 9.2 (7.3 – 11.7)           |                           |
|                                   | All                               | 211           | 110 (52) | 122 (58)    | 4.8 (4.0 – 6.9)   | 12.3 (9.8 – 16.1)          |                           |

Abbreviations: NR = Not reached; \*2 patients without response evaluation; \*\*15 patients without response evaluation

*Corticosteroid Therapy in HCC*

**Figure S1.** Kaplan-Meier curves illustrating the relationship between indication for corticosteroid therapy (CT) and OS (A). Panels B and C highlight the difference in PFS (B) and OS (C) between patients receiving corticosteroid therapy for cancer-related versus non cancer-related indications.

**A.**

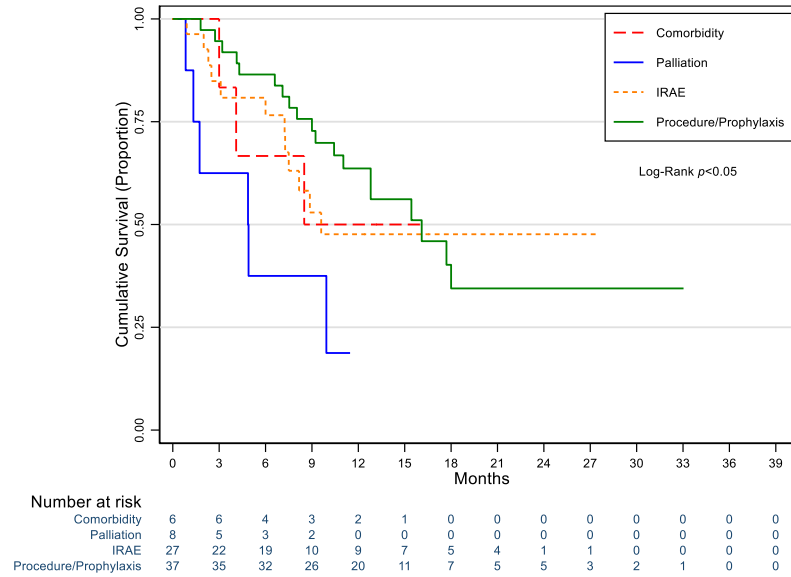

**B.**

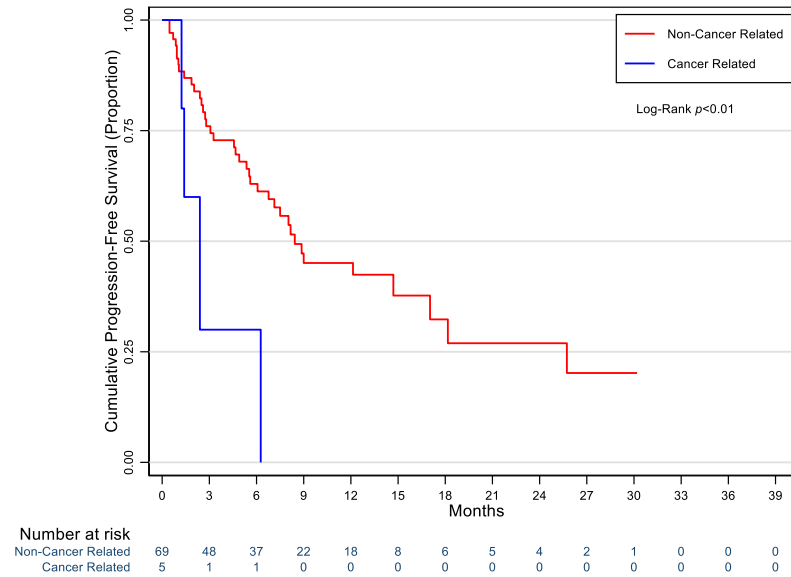

*Corticosteroid Therapy in HCC*

**C.**

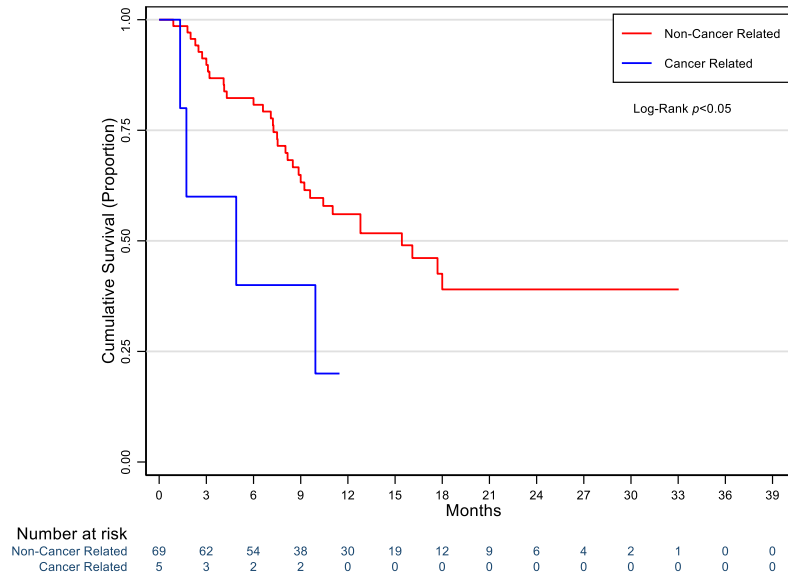

*Corticosteroid Therapy in HCC*

**Figure S2.** The relationship between duration of corticosteroid therapy (CT, **A**) daily predisone (PDN)-equivalent dose (**B**) and OS.

**A.**

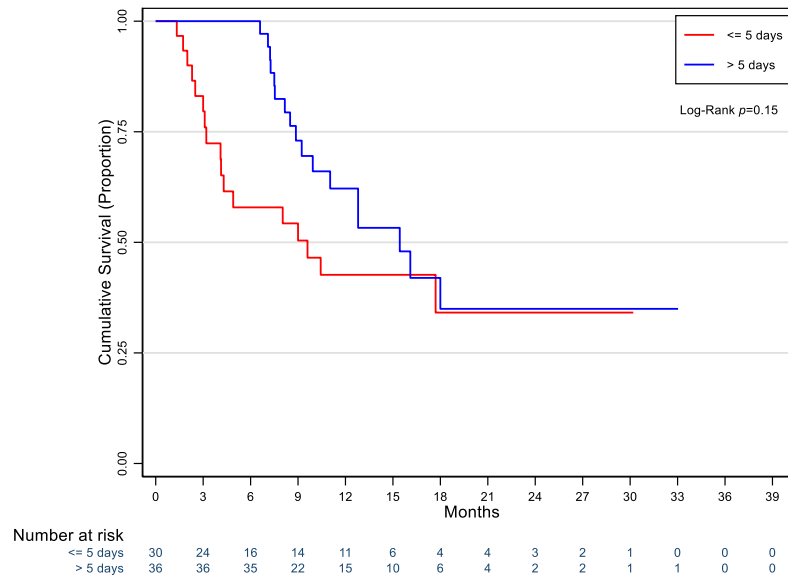

**B.**

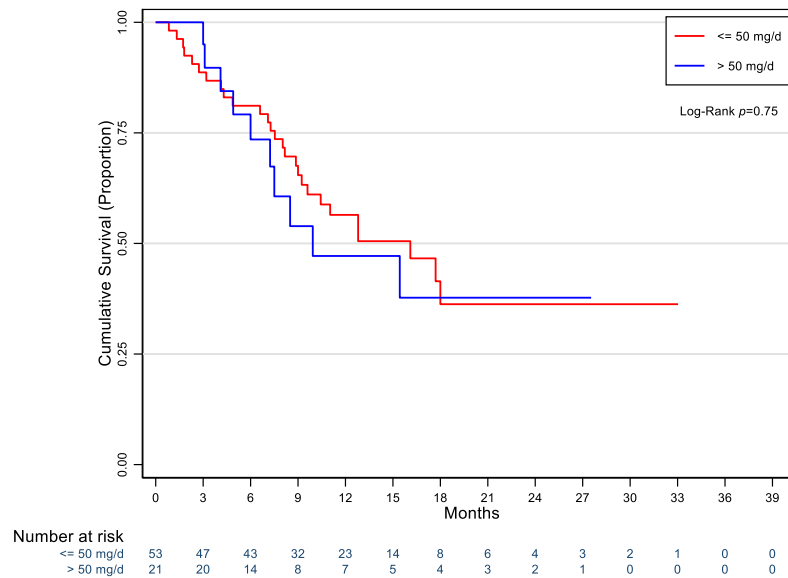

*Corticosteroid Therapy in HCC*

**Figure S3.** The relationship between corticosteroid therapy (CT) OS (A) and PFS (B) in patients with Child Pugh A cirrhosis.

**A.**

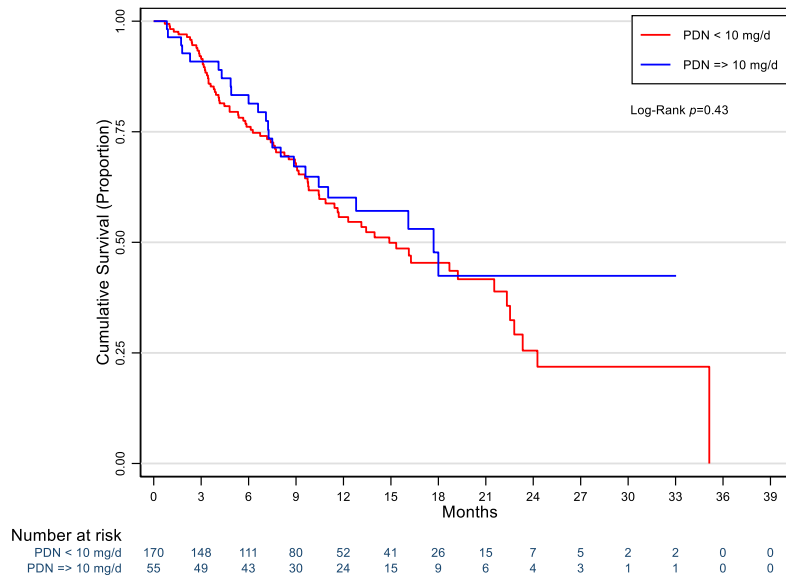

**B.**

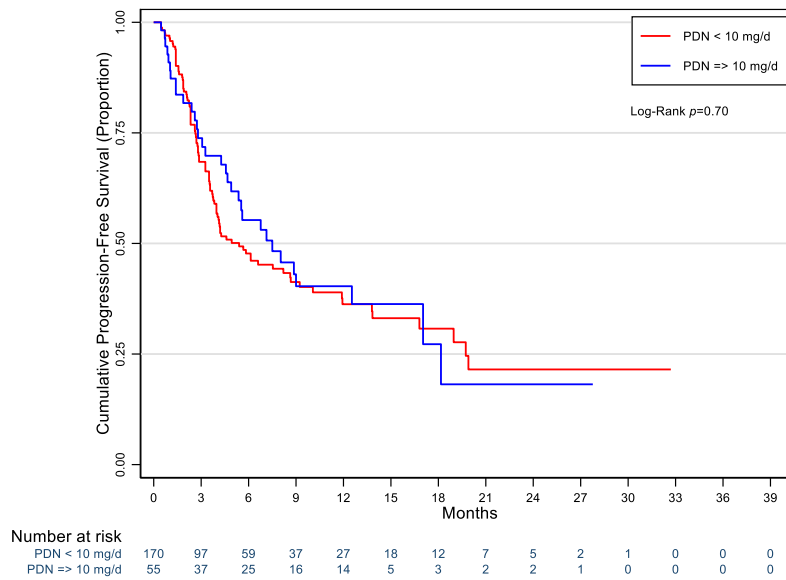

*Corticosteroid Therapy in HCC*

**Figure S4.** The relationship between timing of corticosteroid therapy (CT) and OS (A) and PFS (B) in patients with Child Pugh A cirrhosis.

**A.**

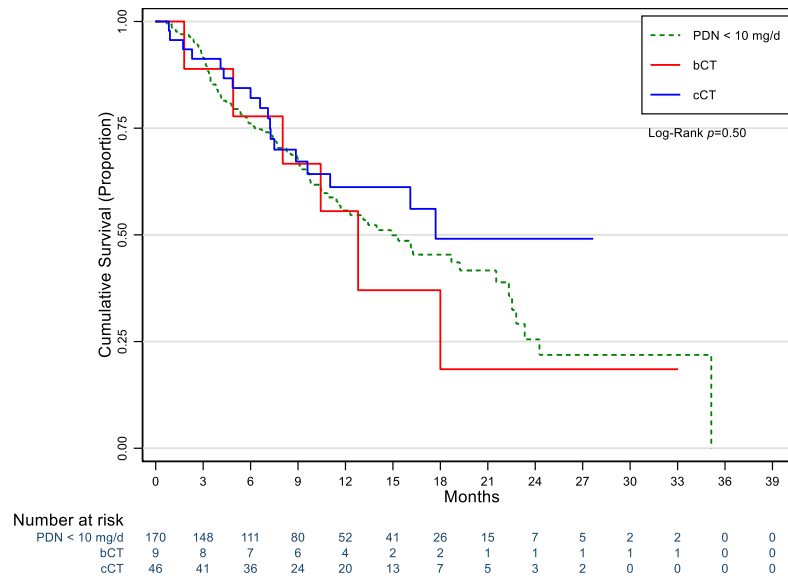

**B.**

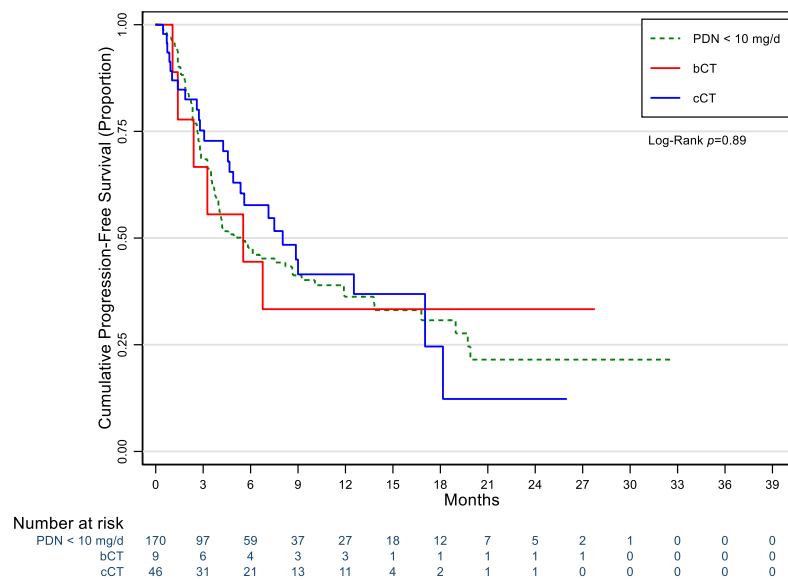

Supplement: jitc-2020-000726supp001_data_supplement.pdf [file jitc-2020-000726supp001_data_supplement.pdf]
